# Supplementary material for: Changes in the Responsiveness of the Hypothalamic-Pituitary-Gonadal Axis to Kisspeptin-10 Administration during Pubertal Transition in Boys
Source: Hindawi journal article supplement (doi:10.1155/2018/1475967), 2018-06-26
Supplement: f1 [file 1475967.f1.pdf]

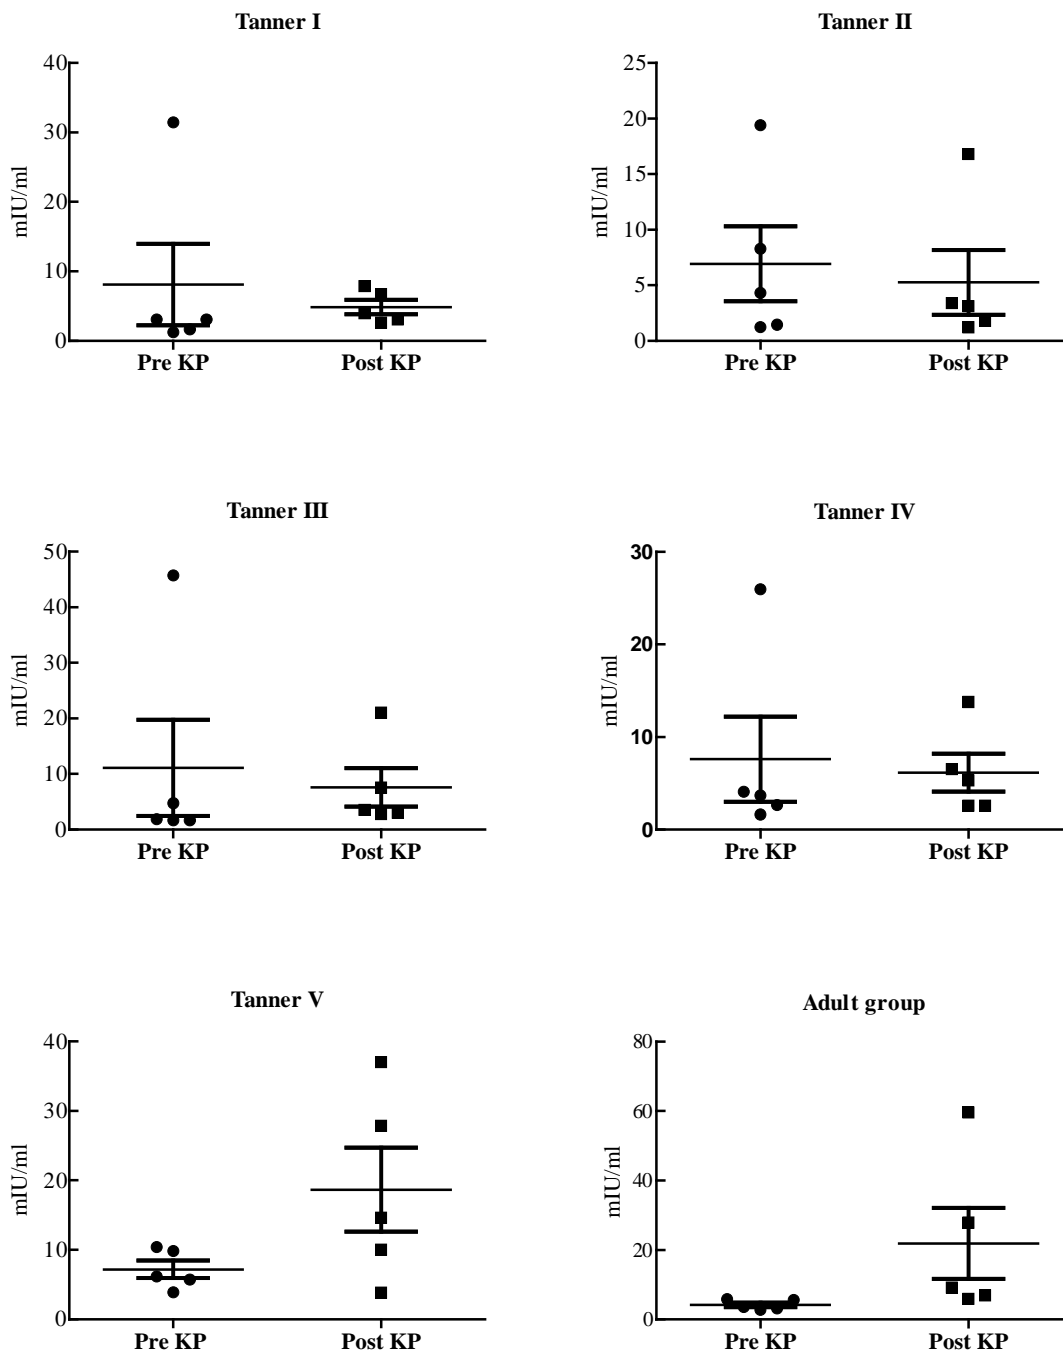

**Figure 1:** Scatter plot of plasma LH in different groups

## Plasma LH levels in Tanner stage I boys at different time points

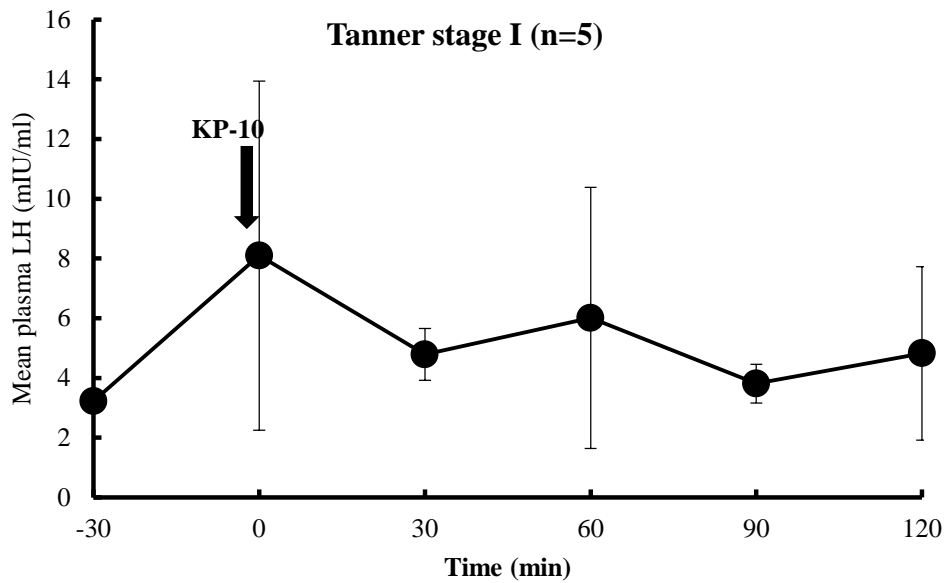

**Figure 2:** Mean $\pm$ SEM (n=5) plasma LH concentrations before and after administration of kisspeptin-10 (single iv bolus;  $\downarrow$ ) in Tanner stage I boys. One-way ANOVA with repeated measures showed that there is no significant variation in plasma LH concentrations before and after kisspeptin administrations.

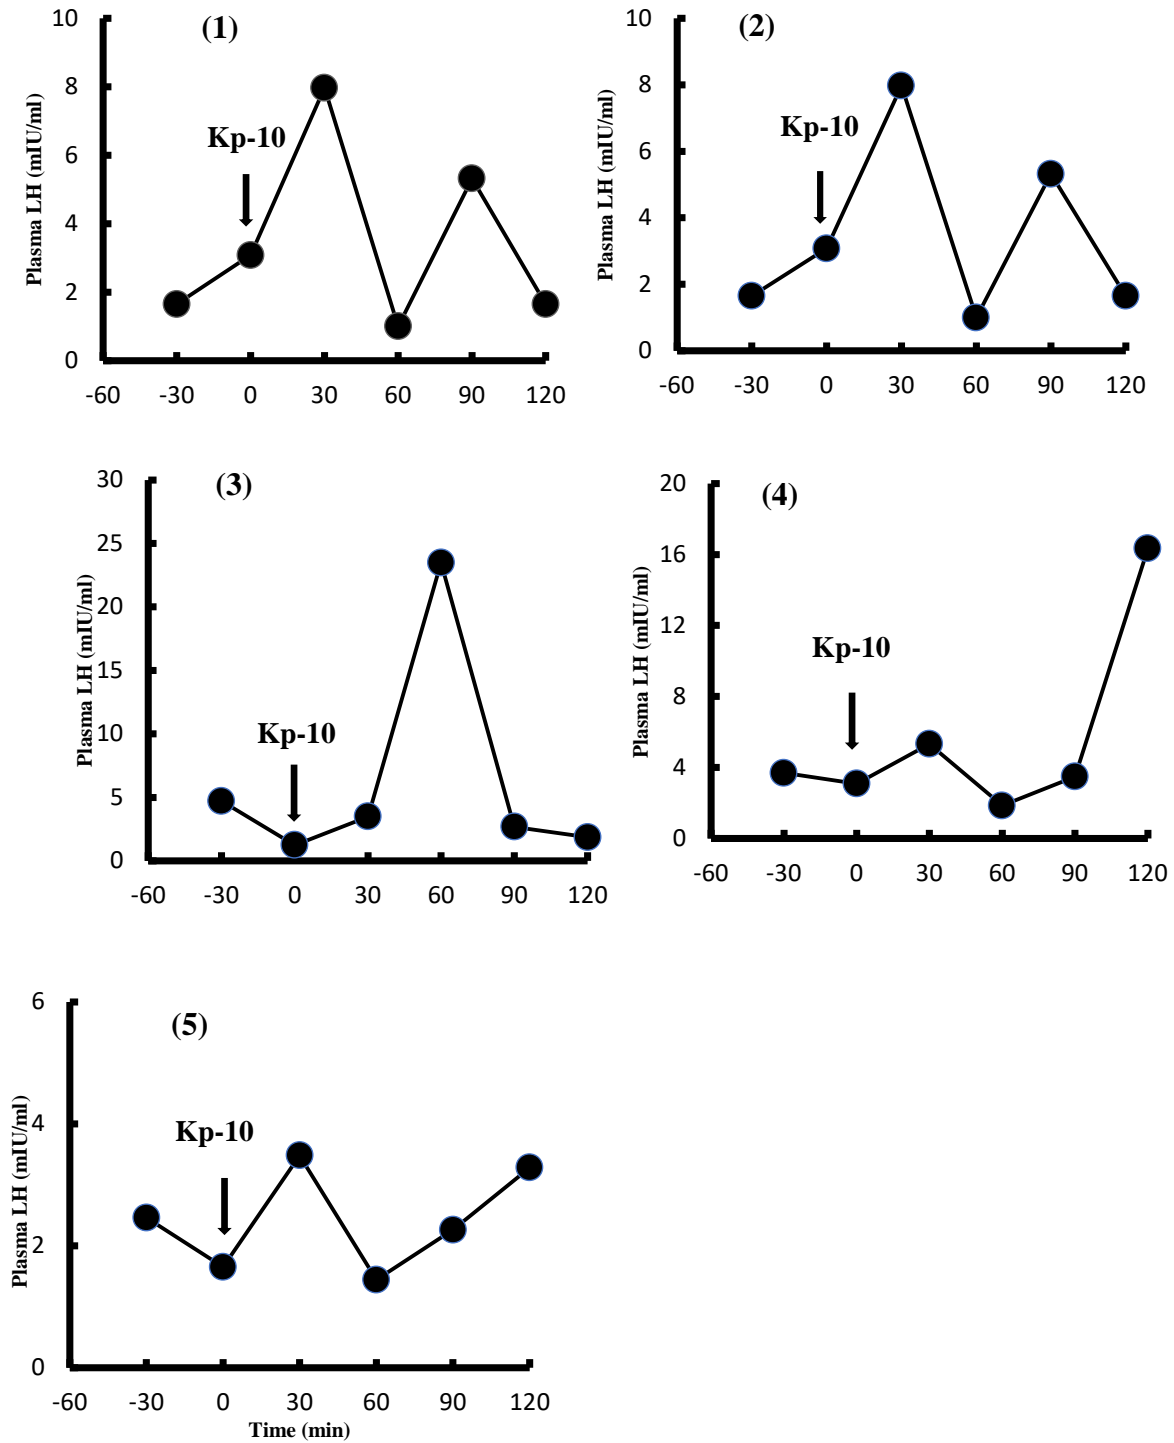

**Figure 3:** Plasma LH concentration before and after administration of kisspeptin-10 (single iv bolus; ↓) in individual Tanner stage I group (1-5).

## Plasma Testosterone levels in Tanner stage I and II boys at different time points

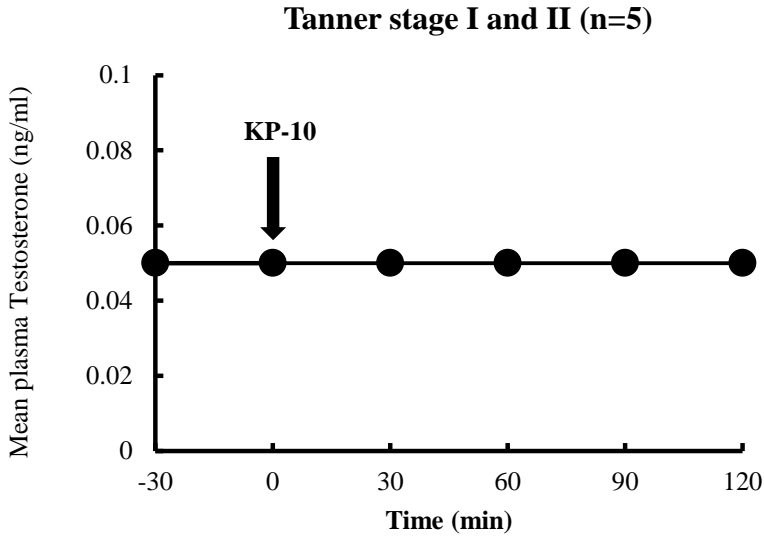

**Figure 4:** Mean $\pm$ SEM (n=5) plasma testosterone concentrations before and after administration of kisspeptin-10 (single iv bolus;  $\downarrow$ ) in Tanner stage I and II boys. One-way ANOVA with repeated measures showed that there is no significant variation in plasma testosterone concentrations after kisspeptin administration.

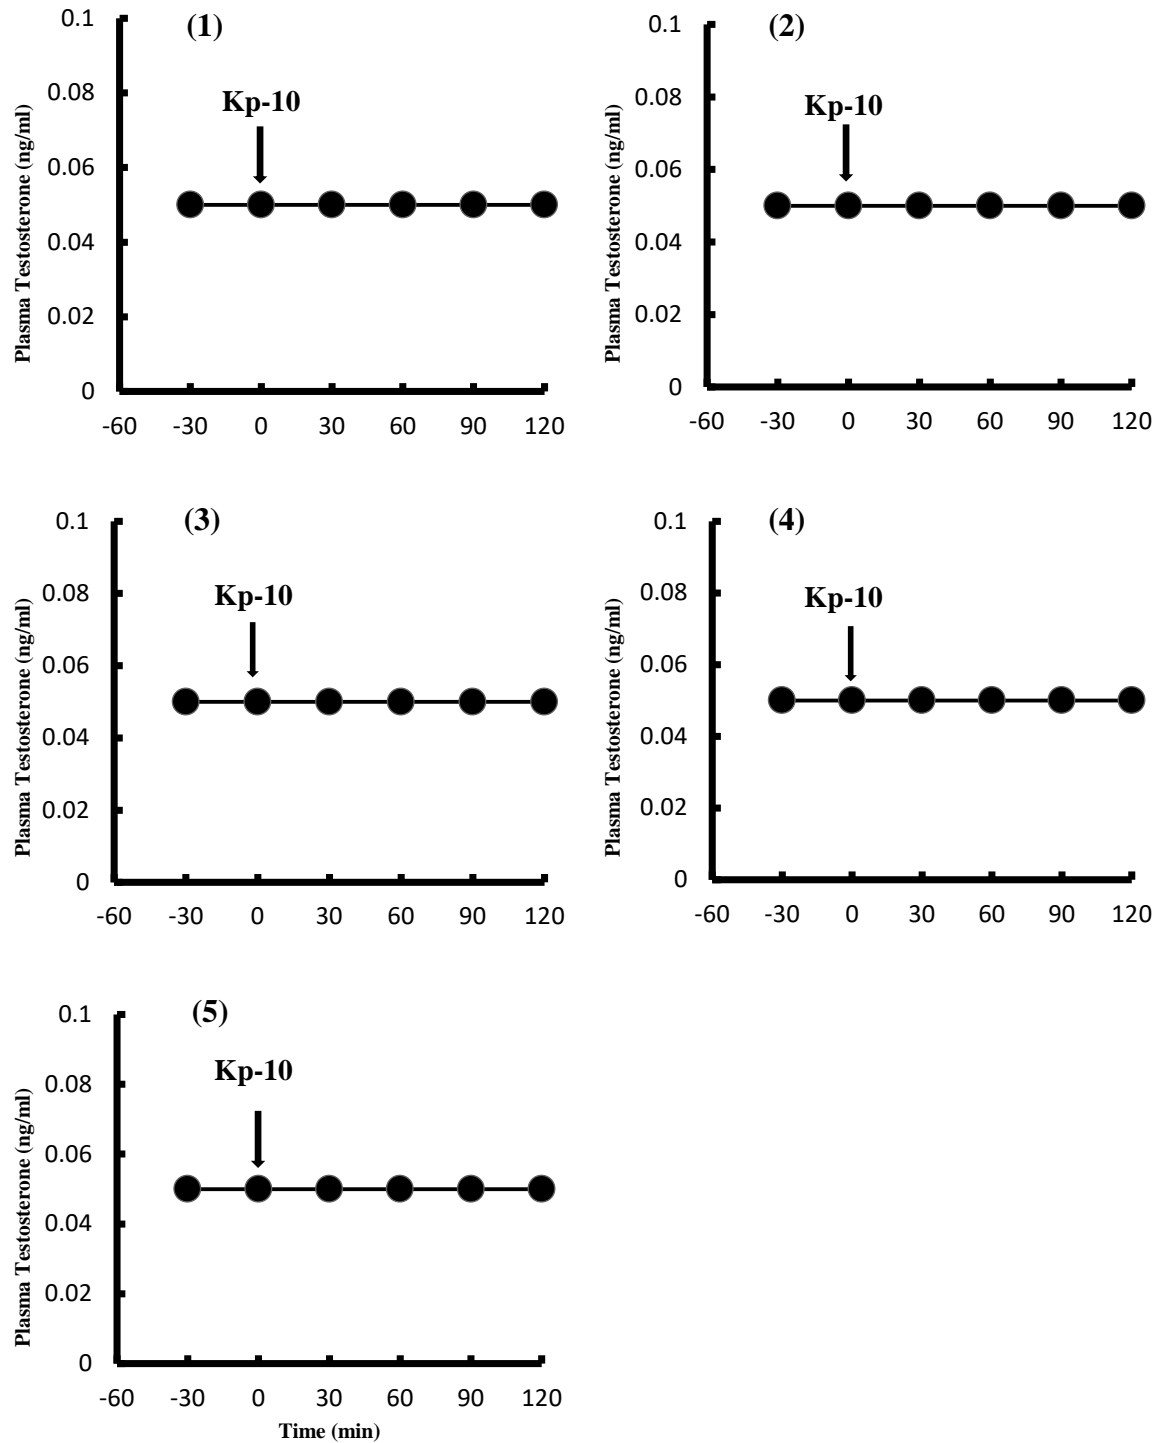

**Figure 5:** Plasma testosterone concentration before and after administration of kisspeptin-10 (single iv bolus; ↓) in individual Tanner stage I and II groups (1-5).

## Plasma LH levels in Tanner stage II boys at different time points

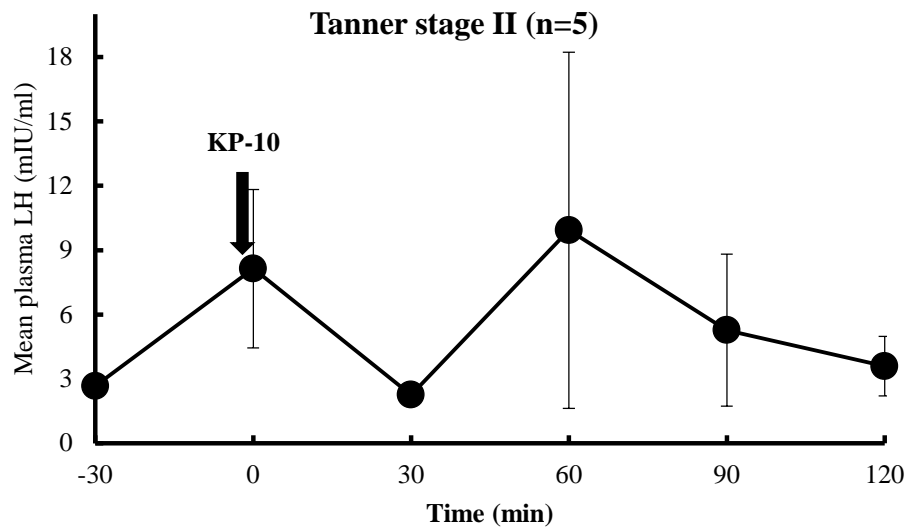

**Figure 6:** Mean $\pm$ SEM (n=5) plasma LH concentrations before and after administration of kisspeptin-10 (single iv bolus;  $\downarrow$ ) in Tanner stage II boys. One-way ANOVA with repeated measures showed that there is no significant variation in plasma LH concentrations before and after kisspeptin administrations.

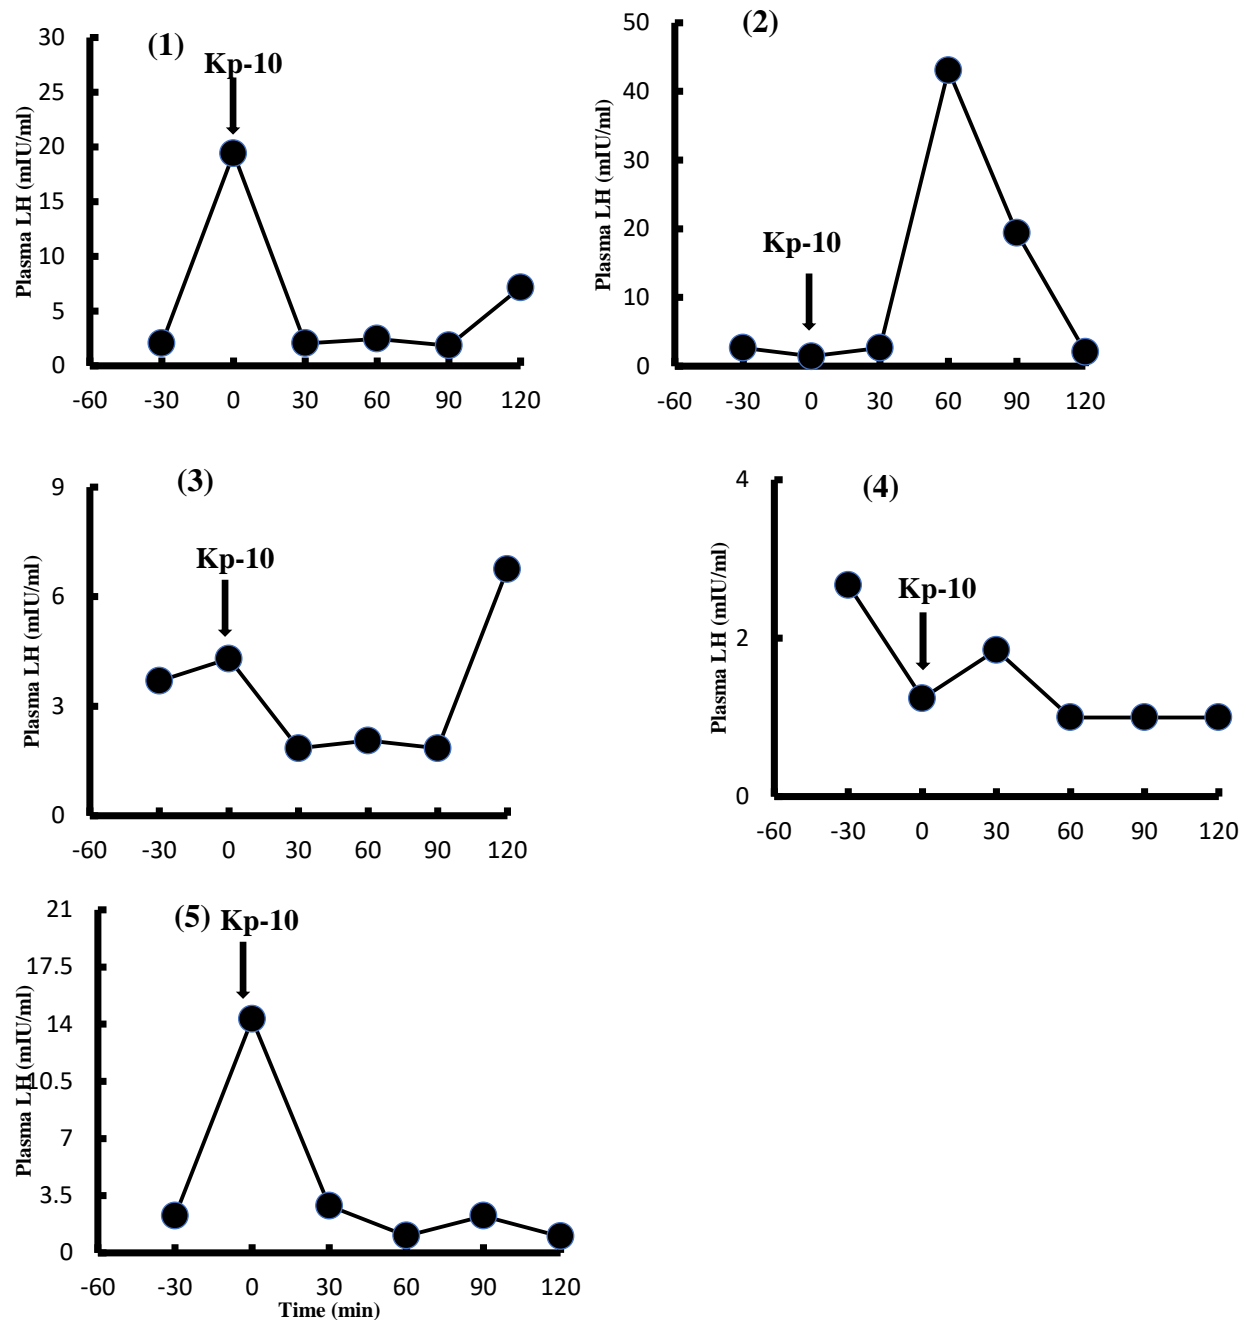

**Figure 7:** Plasma LH concentration before and after administration of kisspeptin-10 (single iv bolus; ↓) in individual Tanner stage II group (1-5).

### Plasma LH levels in Tanner stage III boys at different time points

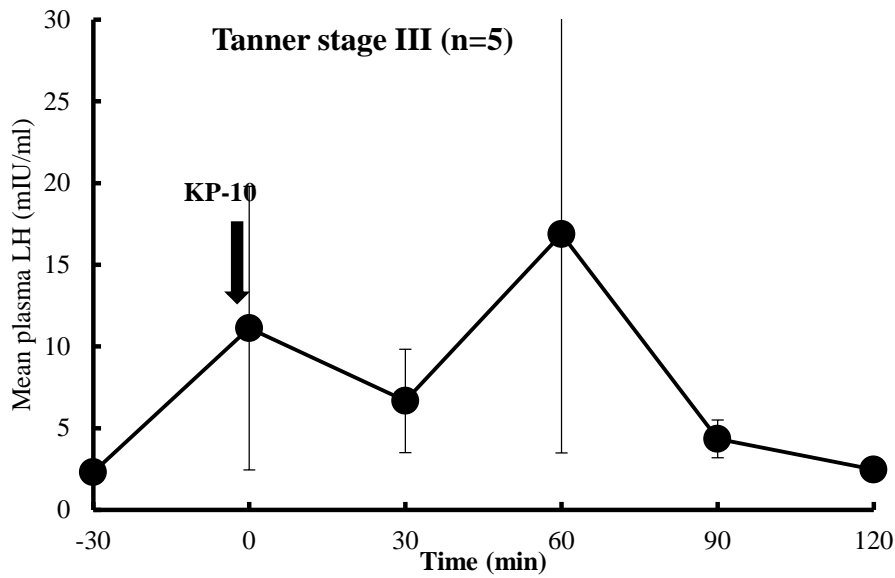

**Figure 8:** Mean $\pm$ SEM (n=5) plasma LH concentrations before and after administration of kisspeptin-10 (single iv bolus;  $\downarrow$ ) in Tanner stage III boys. One-way ANOVA with repeated measures showed that there is no significant variation in plasma LH concentrations before and after kisspeptin administrations.



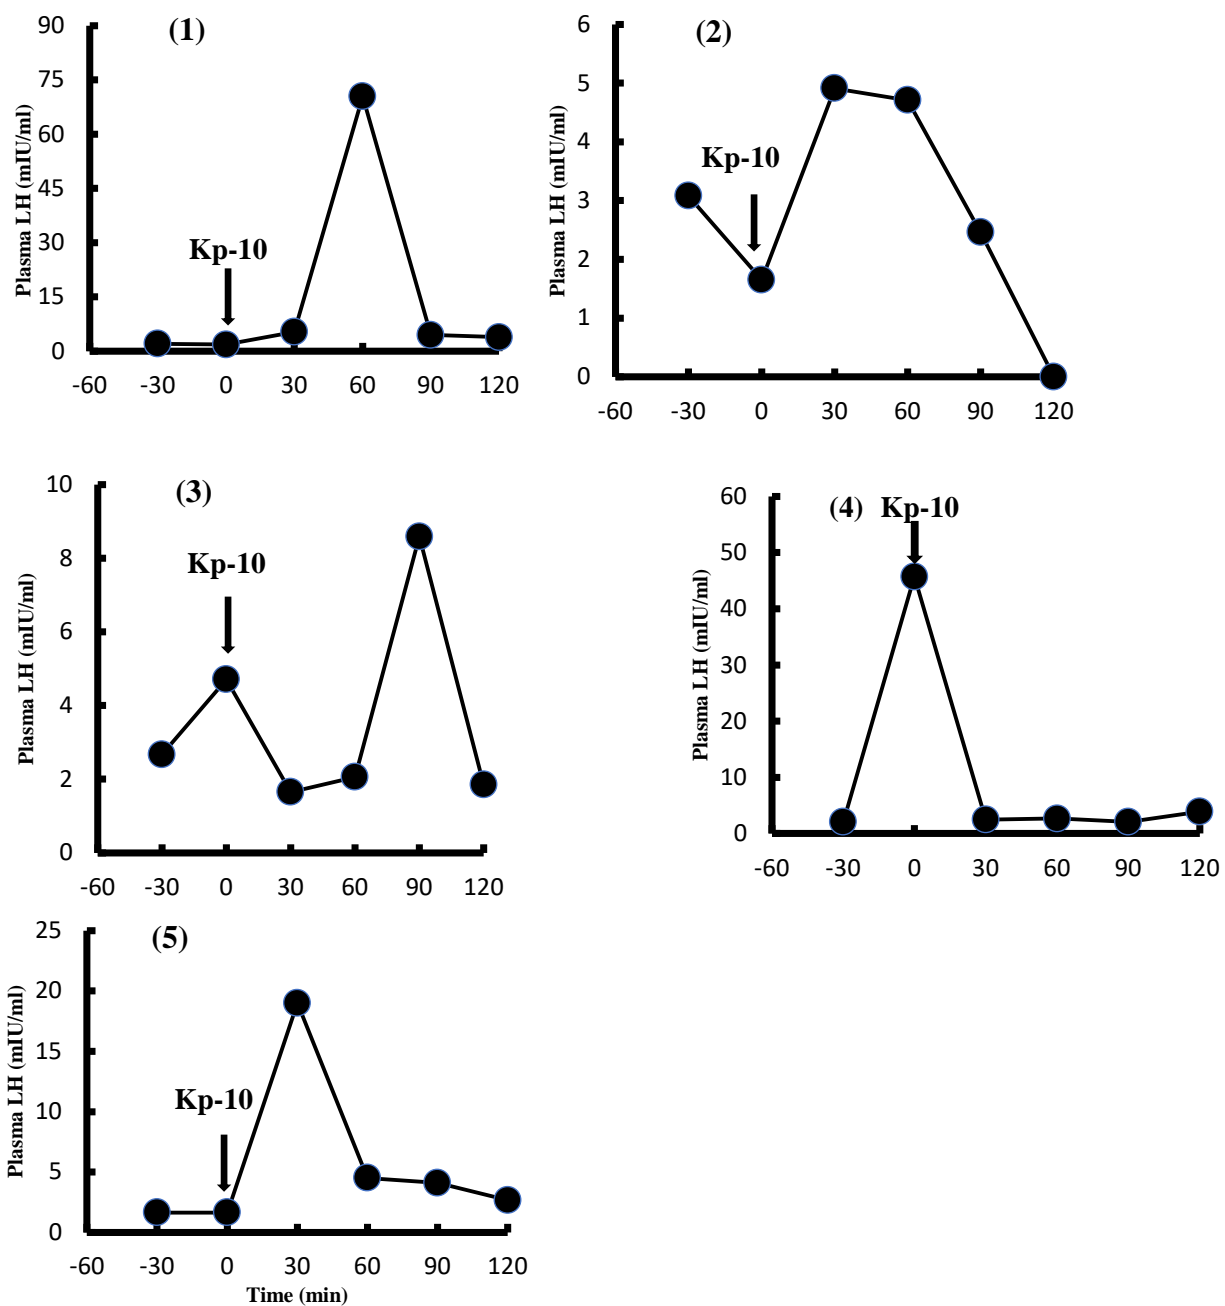

**Figure 9:** Plasma LH concentration before and after administration of kisspeptin-10 (single iv bolus; ↓) in individual Tanner stage III group (1-5).

## Plasma Testosterone levels in Tanner stage III boys at different time points

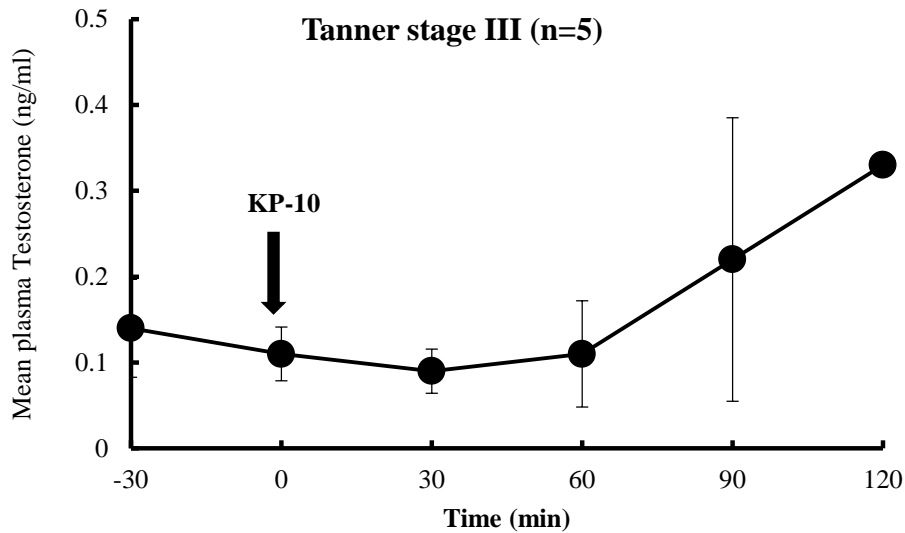

**Figure 10:** Mean $\pm$ SEM (n=5) plasma testosterone concentrations before and after administration of kisspeptin-10 (single iv bolus;  $\downarrow$ ) in Tanner stage III boys. One-way ANOVA with repeated measures showed that there is no significant variation in plasma testosterone concentrations after kisspeptin administrations.

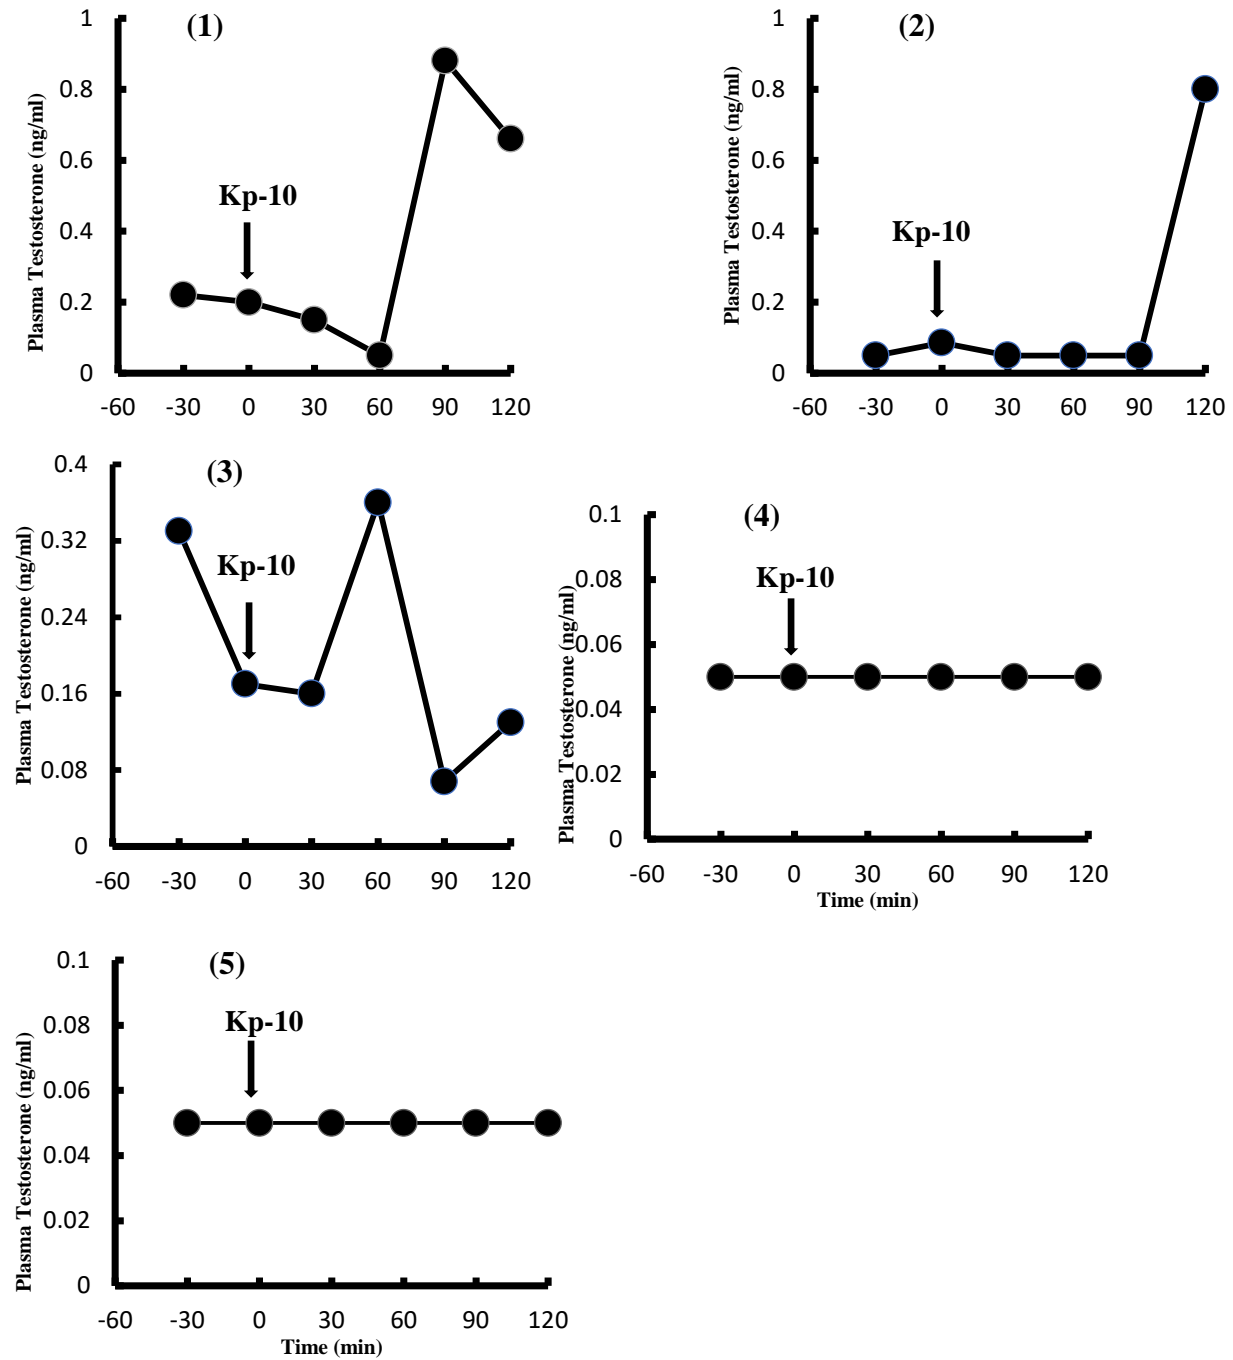

**Figure 11:** Plasma testosterone concentration before and after administration of kisspeptin-10 (single iv bolus; ↓) in individual Tanner stage III group (1-5).

## Plasma LH levels in Tanner stage IV boys at different time points

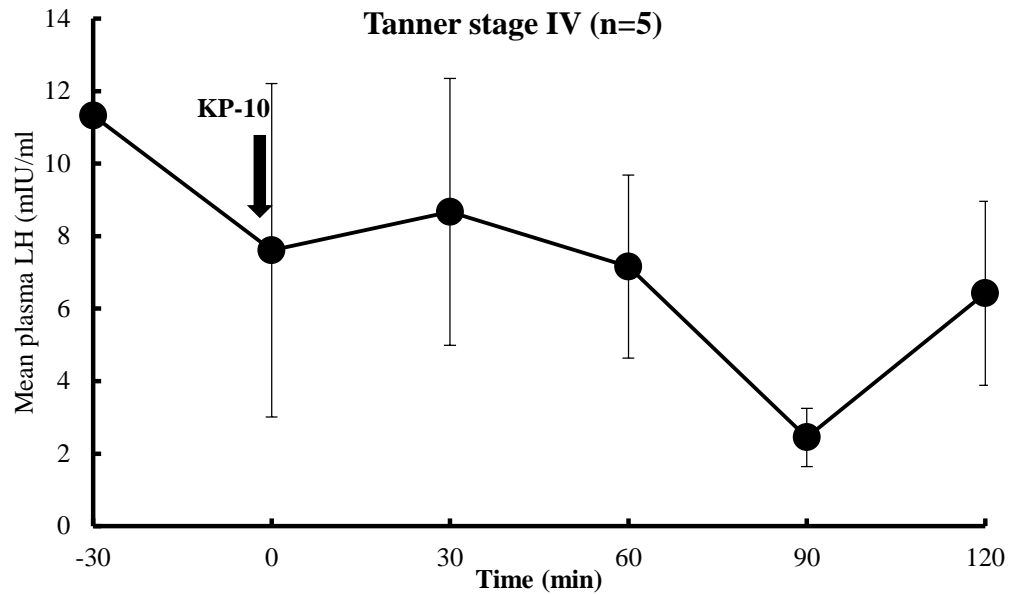

**Figure 12:** Mean  $\pm$ SEM (n=5) plasma LH concentrations before and after administration of kisspeptin-10 (single iv bolus;  $\downarrow$ ) in Tanner stage IV boys. One-way ANOVA with repeated measures showed that there is no significant variation in plasma LH concentrations before and after kisspeptin administrations.

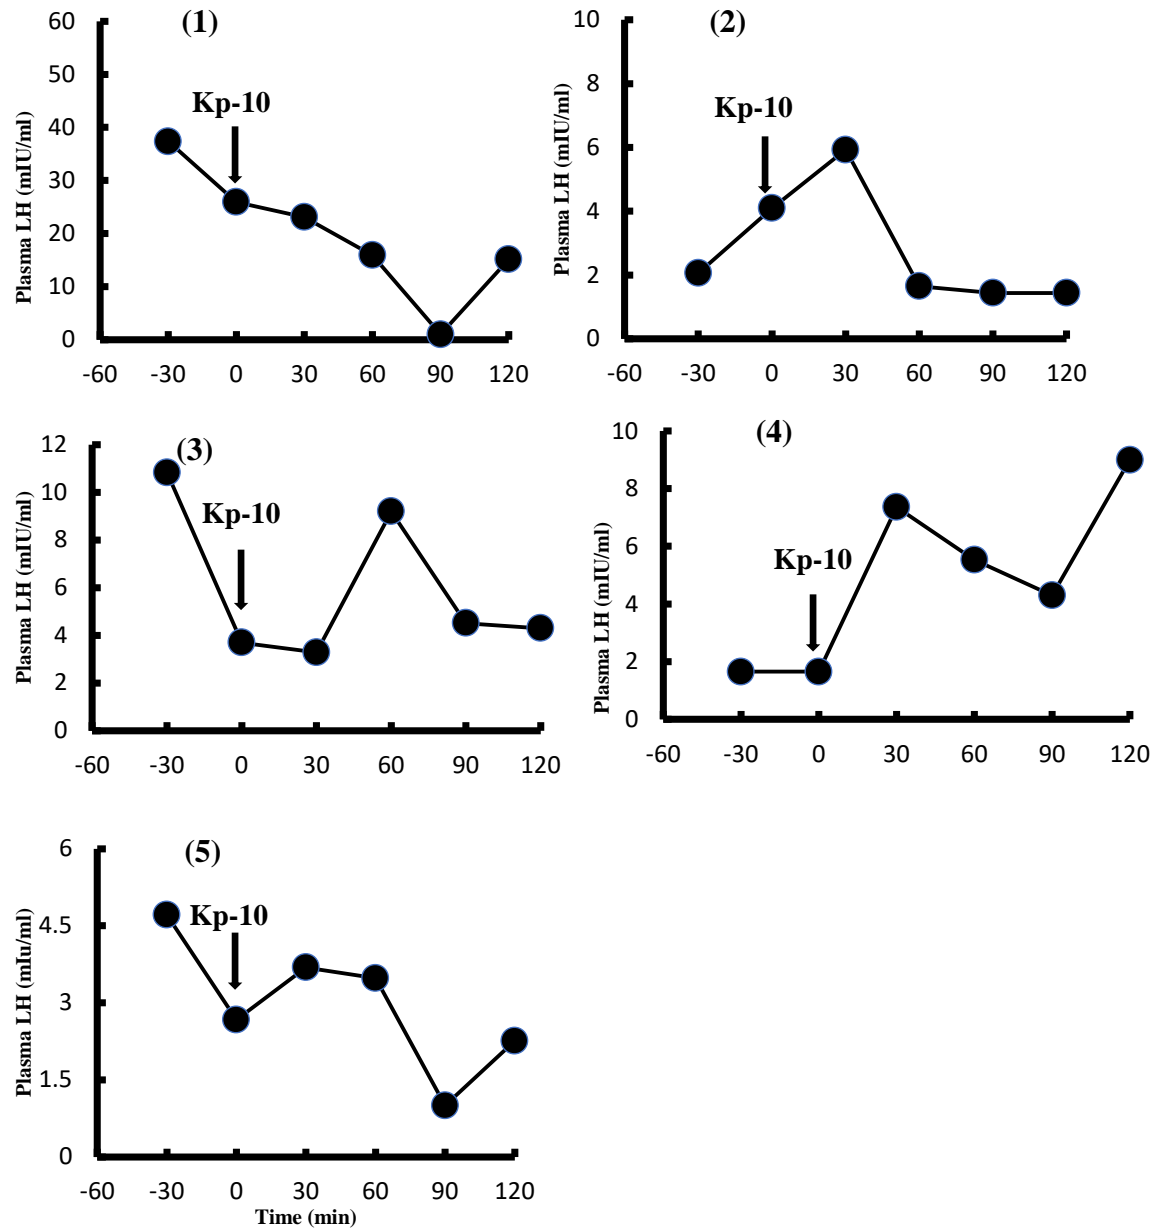

**Figure 13:** Plasma LH concentration before and after administration of kisspeptin-10 (single iv bolus; ↓) in individual Tanner stage IV group (1-5).

## Plasma Testosterone levels in Tanner stage IV boys at different time points

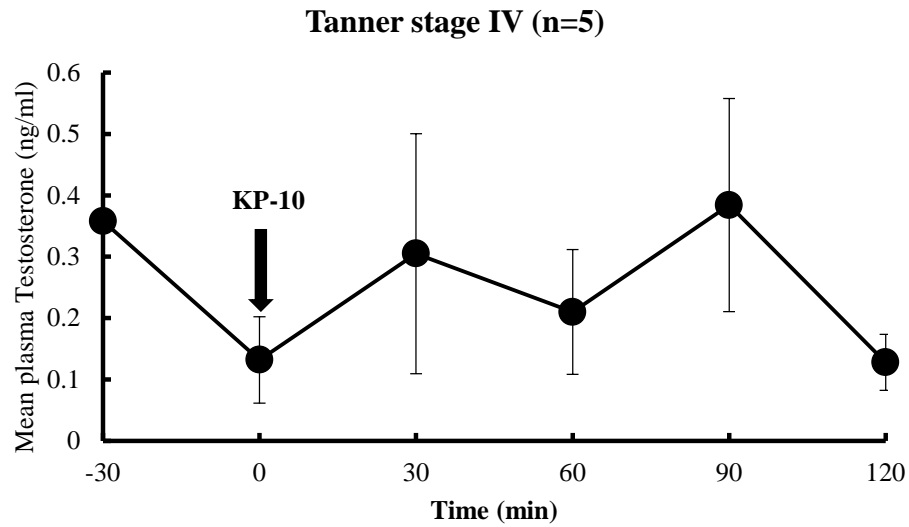

**Figure 14:** Mean $\pm$ SEM (n=5) plasma testosterone concentrations before and after administration of kisspeptin-10 (single iv bolus;  $\downarrow$ ) in Tanner stage IV boys. One-way ANOVA with repeated measures showed that there is no significant variation in plasma testosterone concentrations after kisspeptin administration.

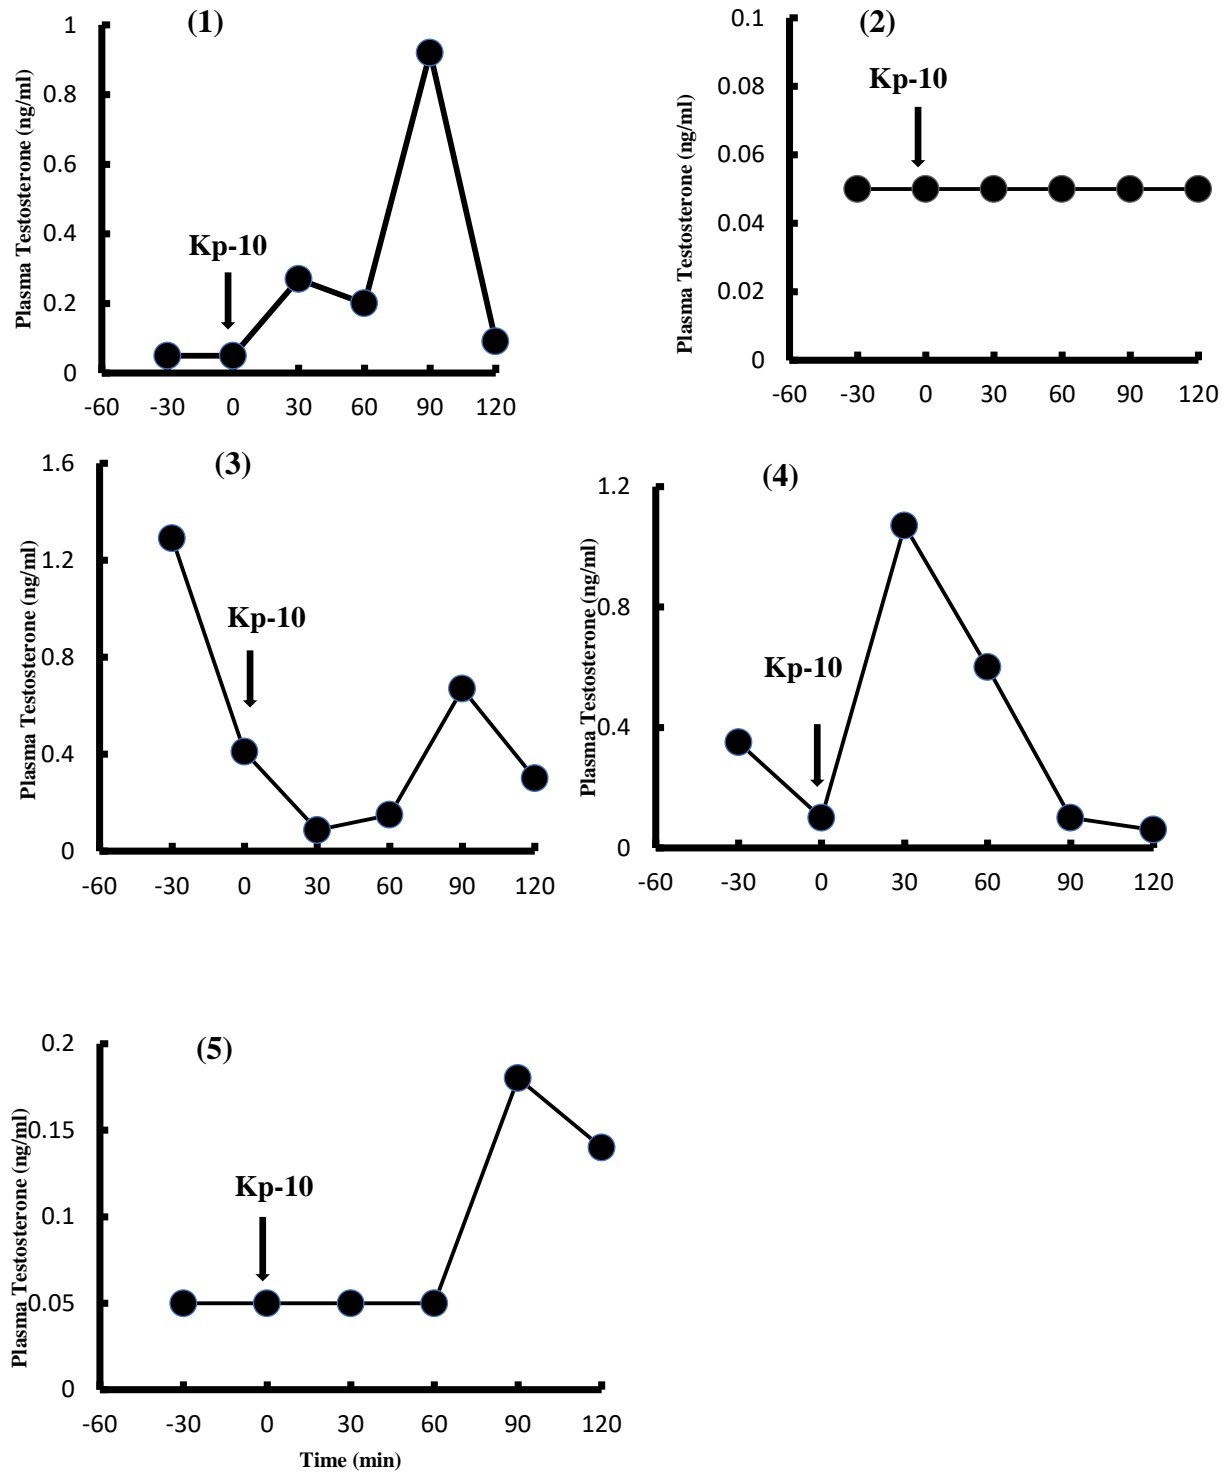

**Figure 15:** Plasma testosterone concentration before and after administration of kisspeptin-10 (single iv bolus; ↓) in individual Tanner stage IV group (1-5).

## Plasma LH levels in Tanner stage V boys at different time points

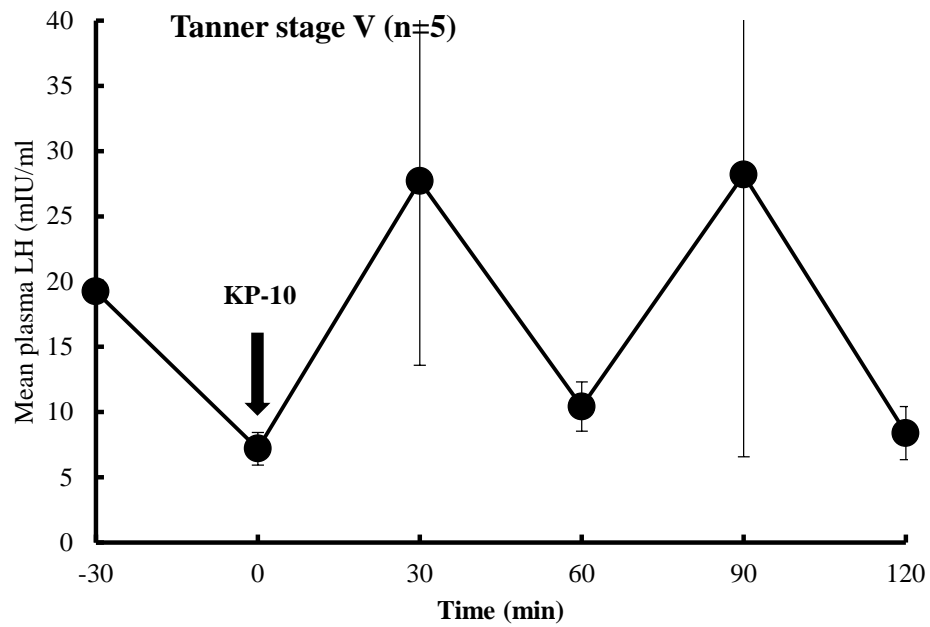

**Figure 16:** Mean $\pm$ SEM (n=5) plasma LH concentrations before and after administration of kisspeptin-10 (single iv bolus;  $\downarrow$ ) in Tanner stage V boys. One-way ANOVA with repeated measures showed that there is no significant variation in plasma LH concentrations before and after kisspeptin administrations.



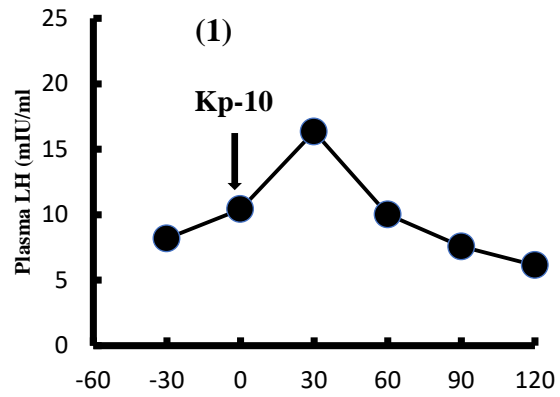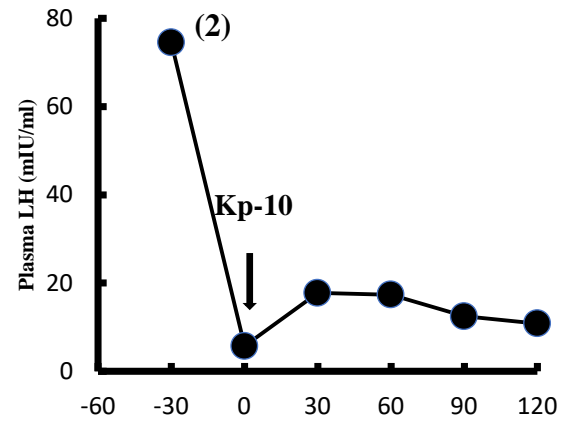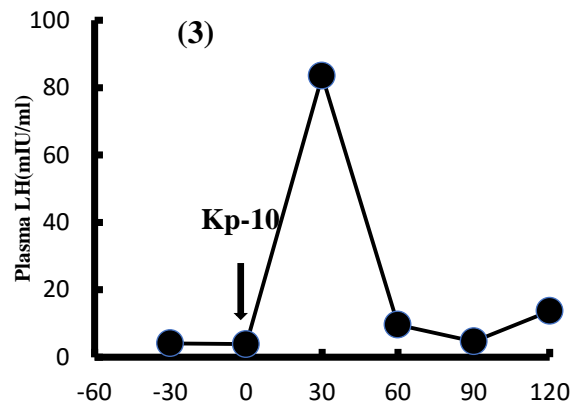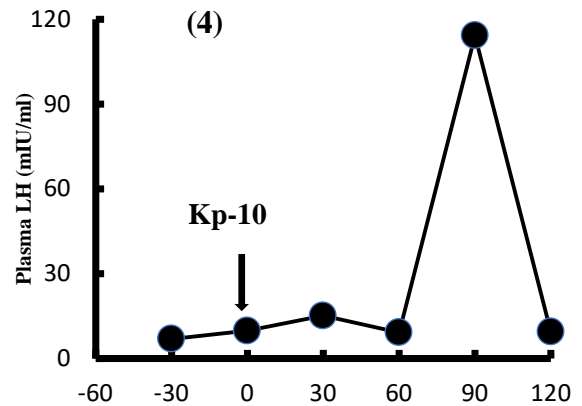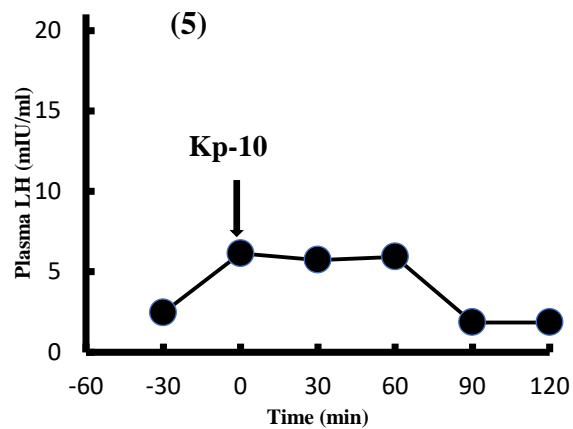

**Figure 17:** Plasma LH concentration before and after administration of kisspeptin-10 (single iv bolus; ↓) in individual Tanner stage V group (1-5).

## Plasma Testosterone levels in Tanner stage V boys at different time points

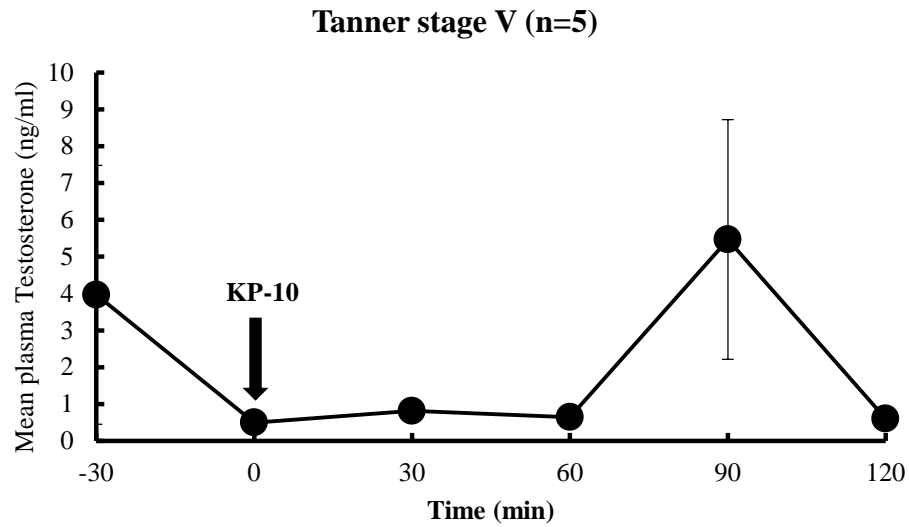

**Figure 18:** Mean $\pm$ SEM (n=5) plasma testosterone concentrations before and after administration of kisspeptin-10 (single iv bolus;  $\downarrow$ ) in Tanner stage V boys. One-way ANOVA with repeated measures showed that there is no significant variation in plasma testosterone concentrations after kisspeptin administrations.

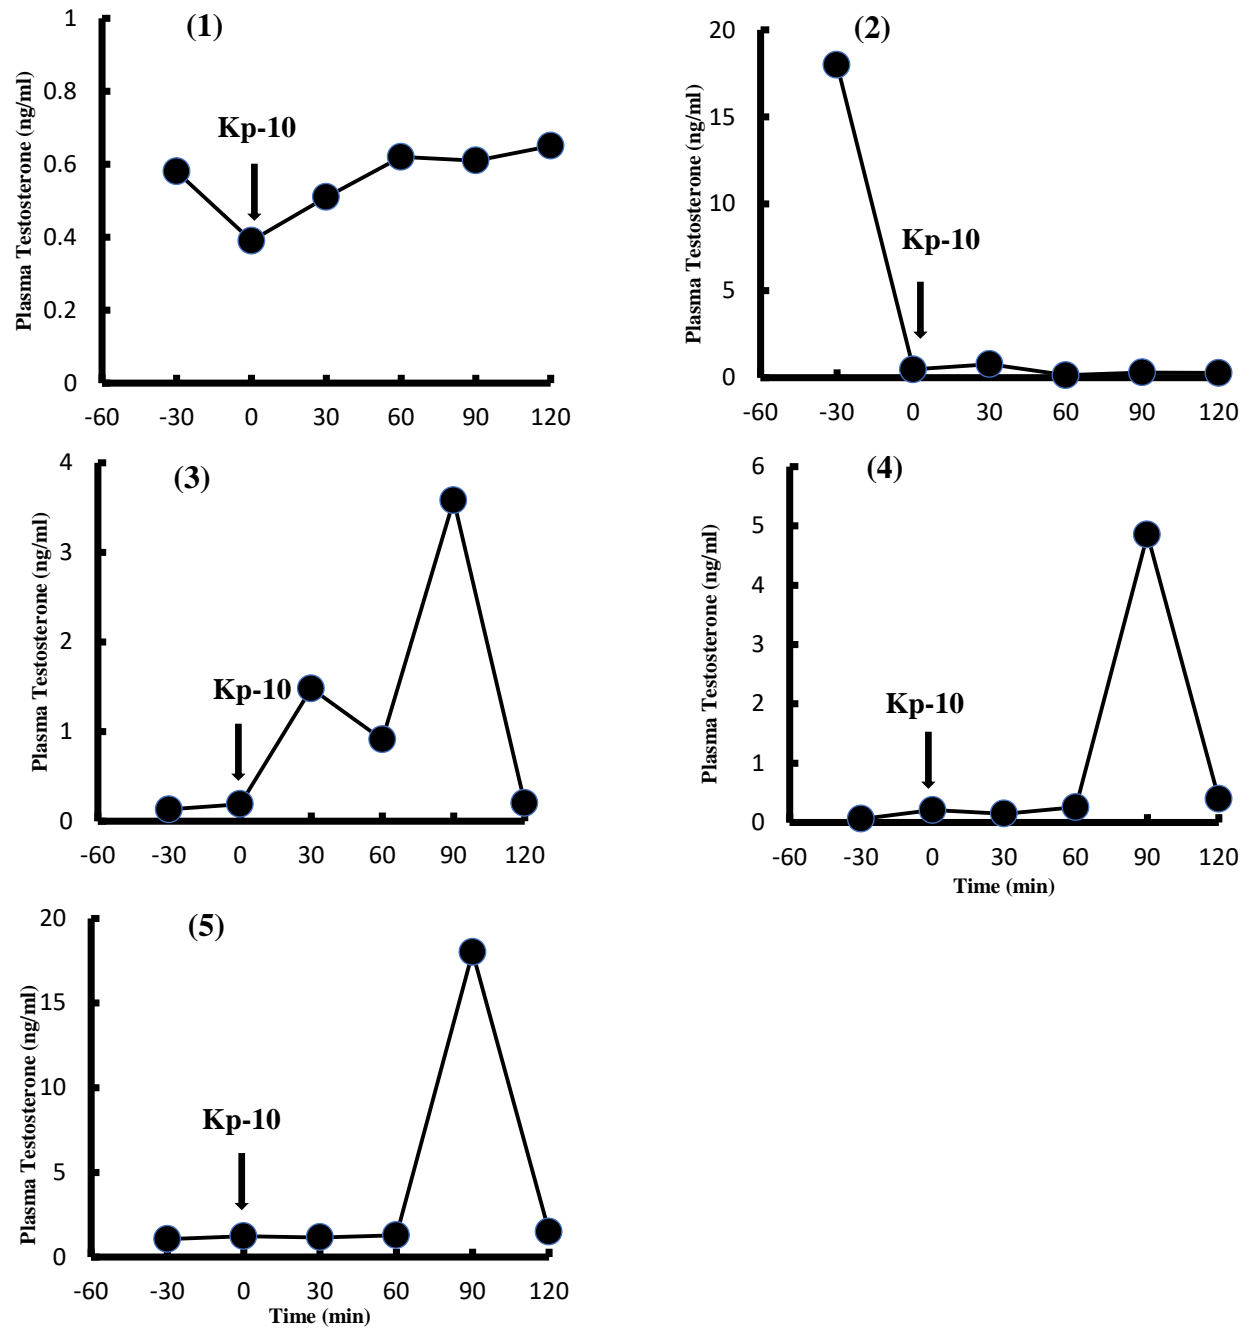

**Figure 19:** Plasma testosterone concentration before and after administration of kisspeptin-10 (single iv bolus; ↓) in individual Tanner stage V group (1-5).

## Plasma LH levels in adult men at different time points

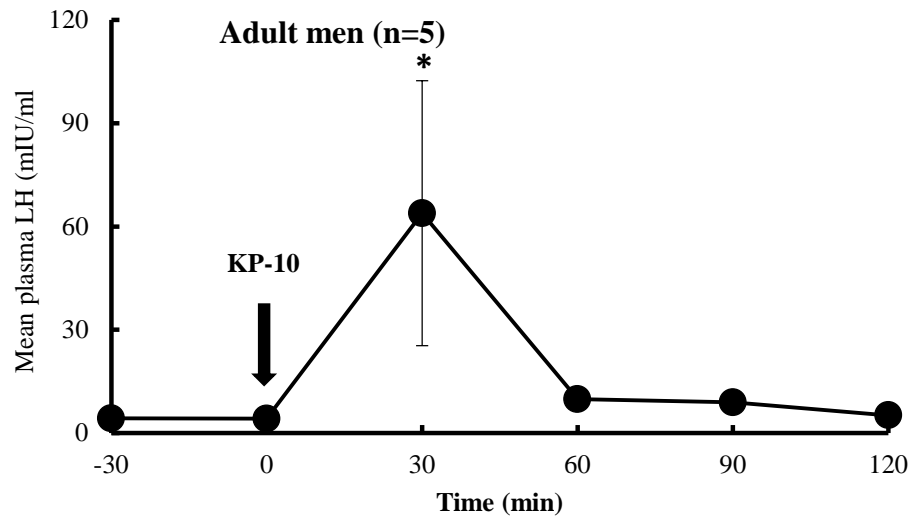

**Figure 20:** Mean $\pm$ SEM plasma LH concentrations before and after administration of kisspeptin-10 (single iv bolus;  $\downarrow$ ) in adult men (n=5). One-way ANOVA with repeated measures on log transformed data showed significant variation in LH levels at different times (\*P<0.05 vs -30 min).

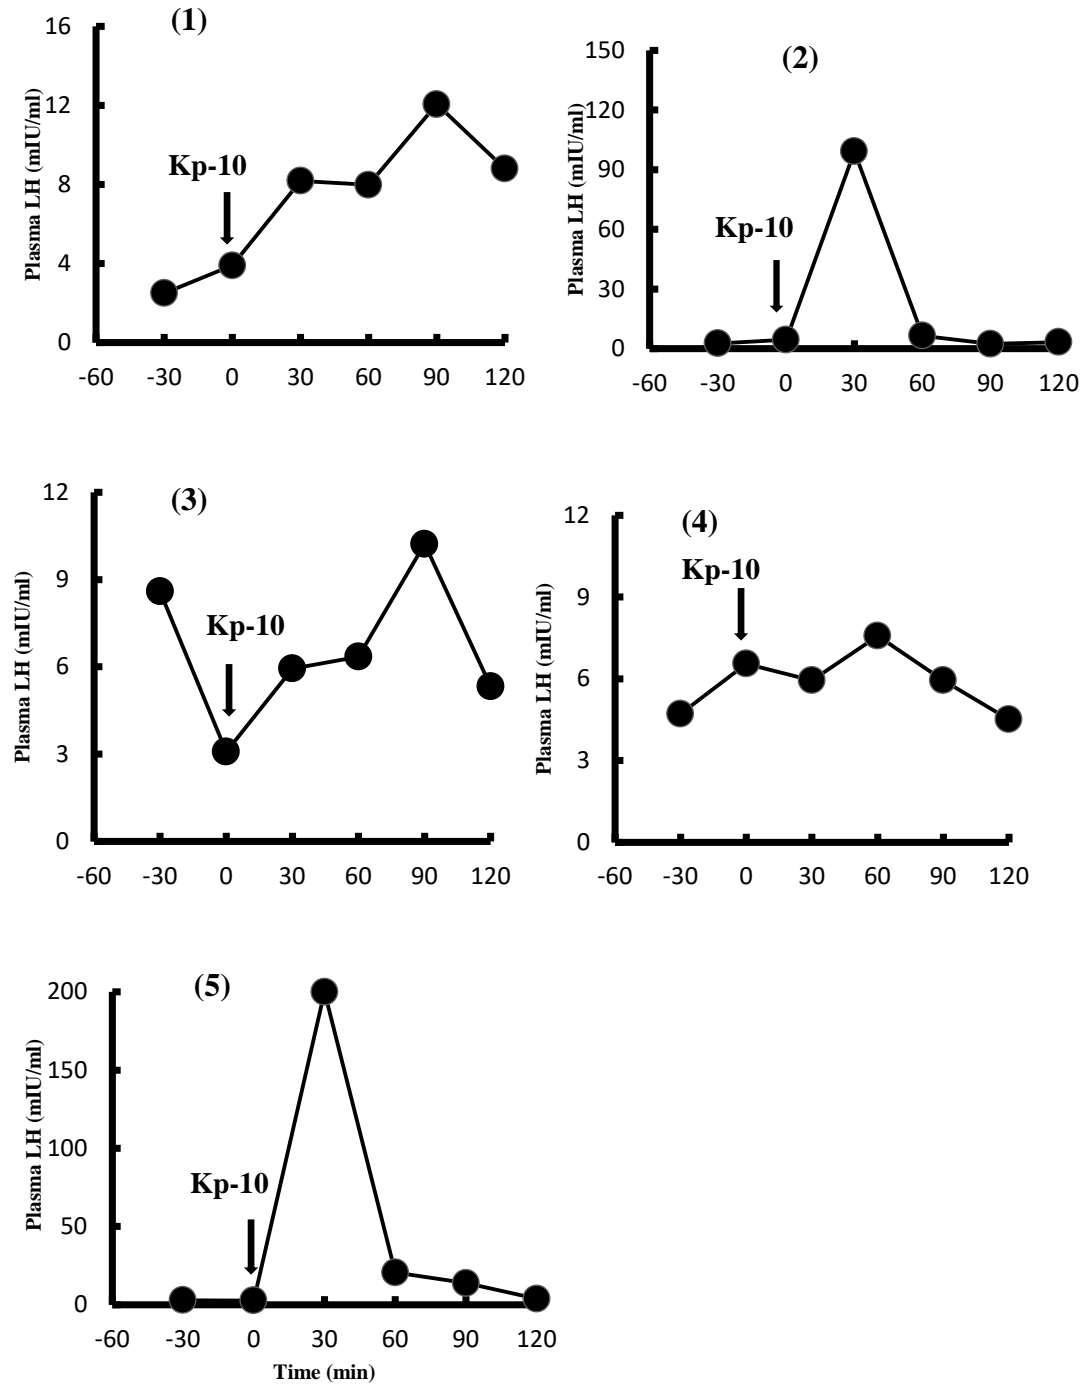

**Figure 21:** Plasma LH concentration before and after administration of kisspeptin-10 (single iv bolus; ↓) in individual adult men (1-5).

## Plasma Testosterone levels in adult men at different time points

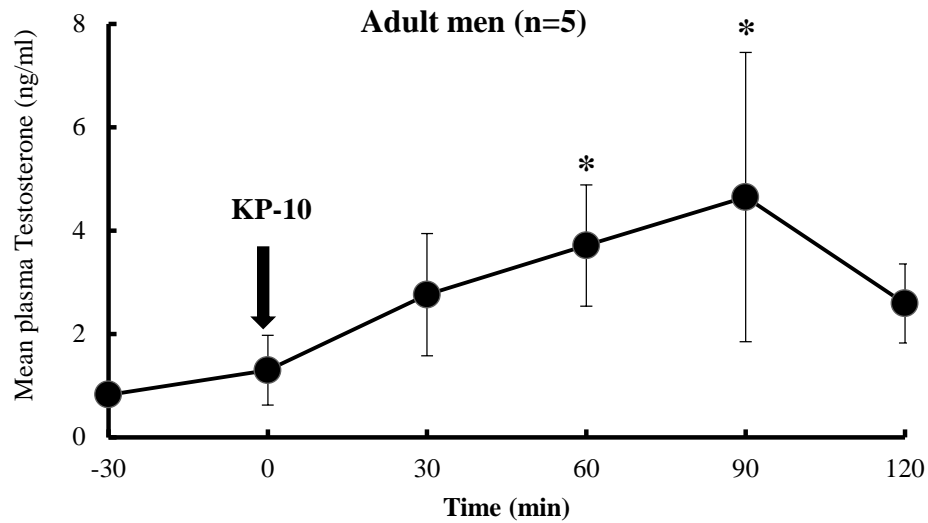

**Figure 22:** Mean $\pm$ SEM plasma testosterone concentrations before and after administration of kisspeptin-10 (single iv bolus;  $\downarrow$ ) in adult men (n=5). One-way ANOVA with repeated measures on log transformed data showed significant variation in testosterone levels at different times (\*P<0.05 vs 0 min).

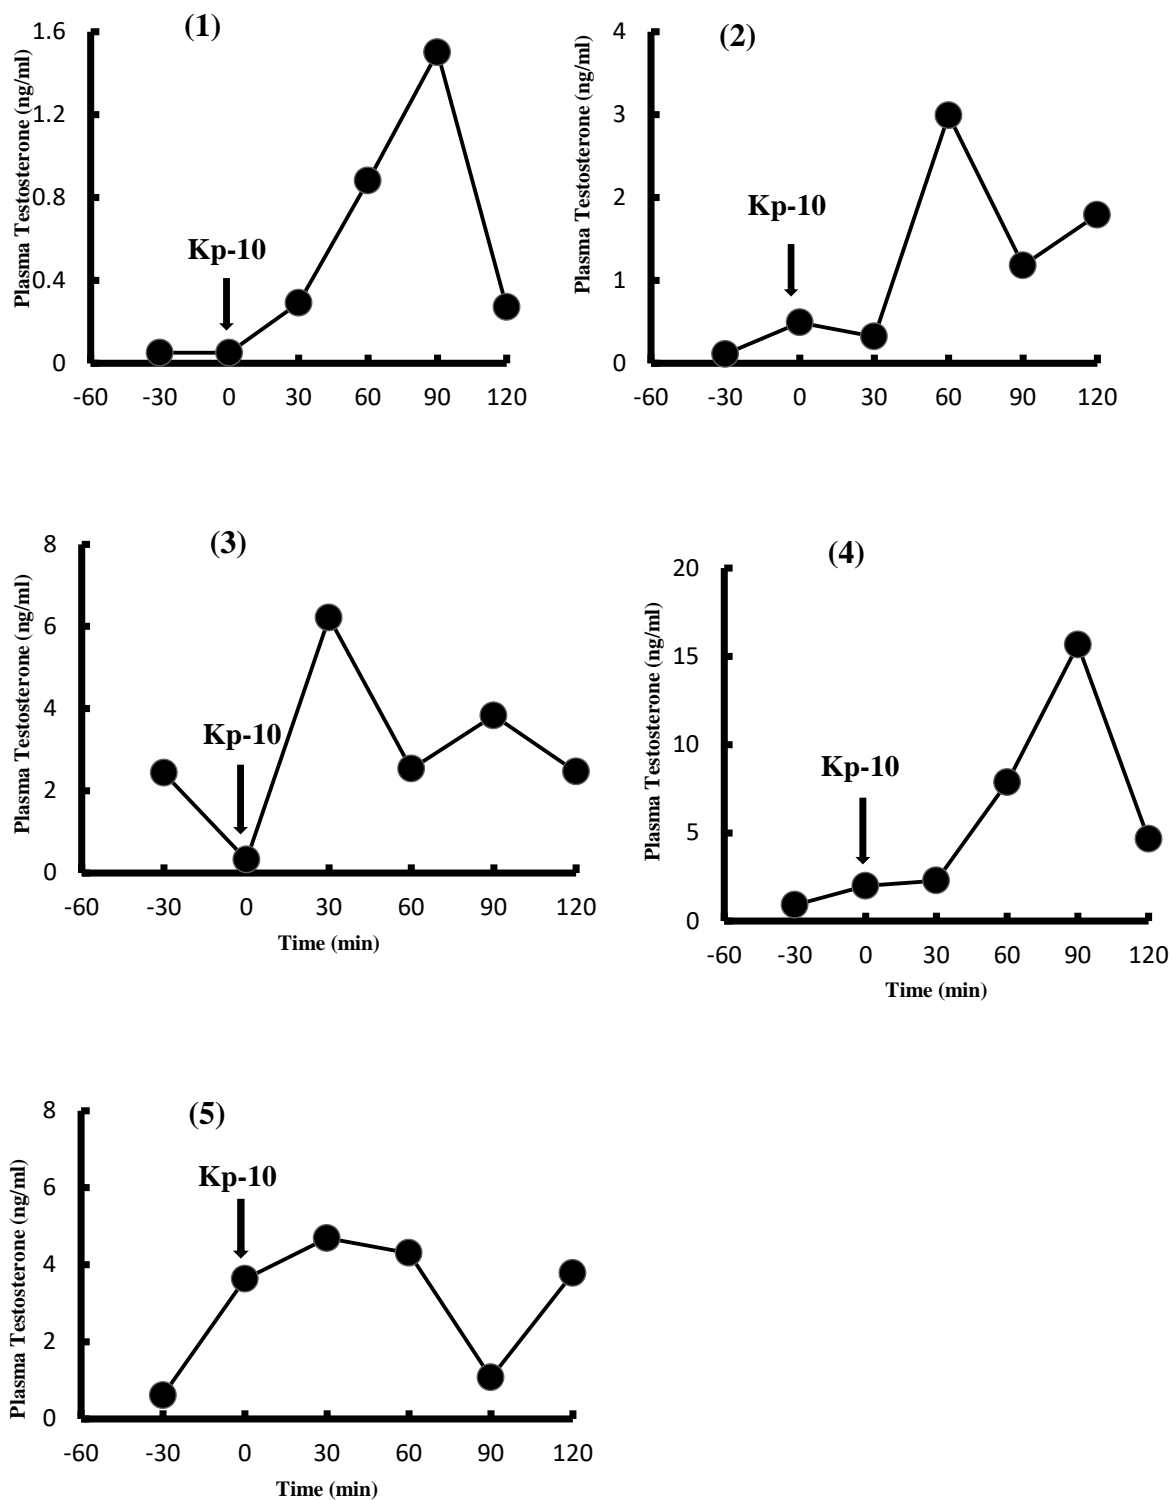

**Figure 23:** Plasma testosterone concentration before and after administration of kisspeptin-10 (single iv bolus; ↓) in individual adult men (1-5).
